# Supplementary material for: Insulin–Mimetic Dihydroxanthyletin-Type Coumarins from Angelica decursiva with Protein Tyrosine Phosphatase 1B and α-Glucosidase Inhibitory Activities and Docking Studies of Their Molecular Mechanisms
Source: PubMed Central journal article supplement (PMC7919472; doi:10.3390/antiox10020292), 2021-02-15
Supplement: antioxidants-10-00292-s001.pdf [file antioxidants-10-00292-s001.pdf]

# Insulin-mimetic dihydroxanthyletin-type coumarins from *Angelica decursiva* with protein tyrosine phosphatase 1B and $\alpha$ -glucosidase inhibitory activities and docking studies of their molecular mechanisms

Md Yousof Ali <sup>1</sup>, Susoma Jannat <sup>2</sup>, Hyun Ah Jung <sup>3</sup> and Jae Sue Choi <sup>4\*</sup>

<sup>1</sup> Department of Physiology and Pharmacology, Hotchkiss Brain Institute and Alberta Children's Hospital Research Institute, Cumming School of Medicine, University of Calgary, Calgary, AB T2N 4N1, Canada; mdyousof.ali@ucalgary.ca

<sup>2</sup> Department of Biochemistry and Molecular Biology, University of Calgary, T2N 4N1 Alberta, Canada; jannatacct@gmail.com

<sup>3</sup> Department of Food Science and Human Nutrition, Jeonbuk National University, Jeonju 54896, Korea

<sup>4</sup> Department of Food and Life Science, Pukyong National University, Busan 48513, Korea;

\* Correspondence: jungha@jbnu.ac.kr (H.A.J); choijs@pknu.ac.kr; Tel.: +82-51-629-7547 (J.S.C.)

## Supplementary materials

### Table of Contents

**Figure S1.** Dixon and Lineweaver-Burk plots for PTP1B inhibition of dihydroxanthyletin-type coumarins

**Figure S2.** Dixon and Lineweaver-Burk plots for  $\alpha$ -glucosidase inhibition of dihydroxanthyletin-type coumarins

**Figure S3.** Molecular docking models for PTP1B inhibition of dihydroxanthyletin-type coumarins

**Figure S4.** Molecular docking models for  $\alpha$ -glucosidase inhibition of dihydroxanthyletin-type coumarins

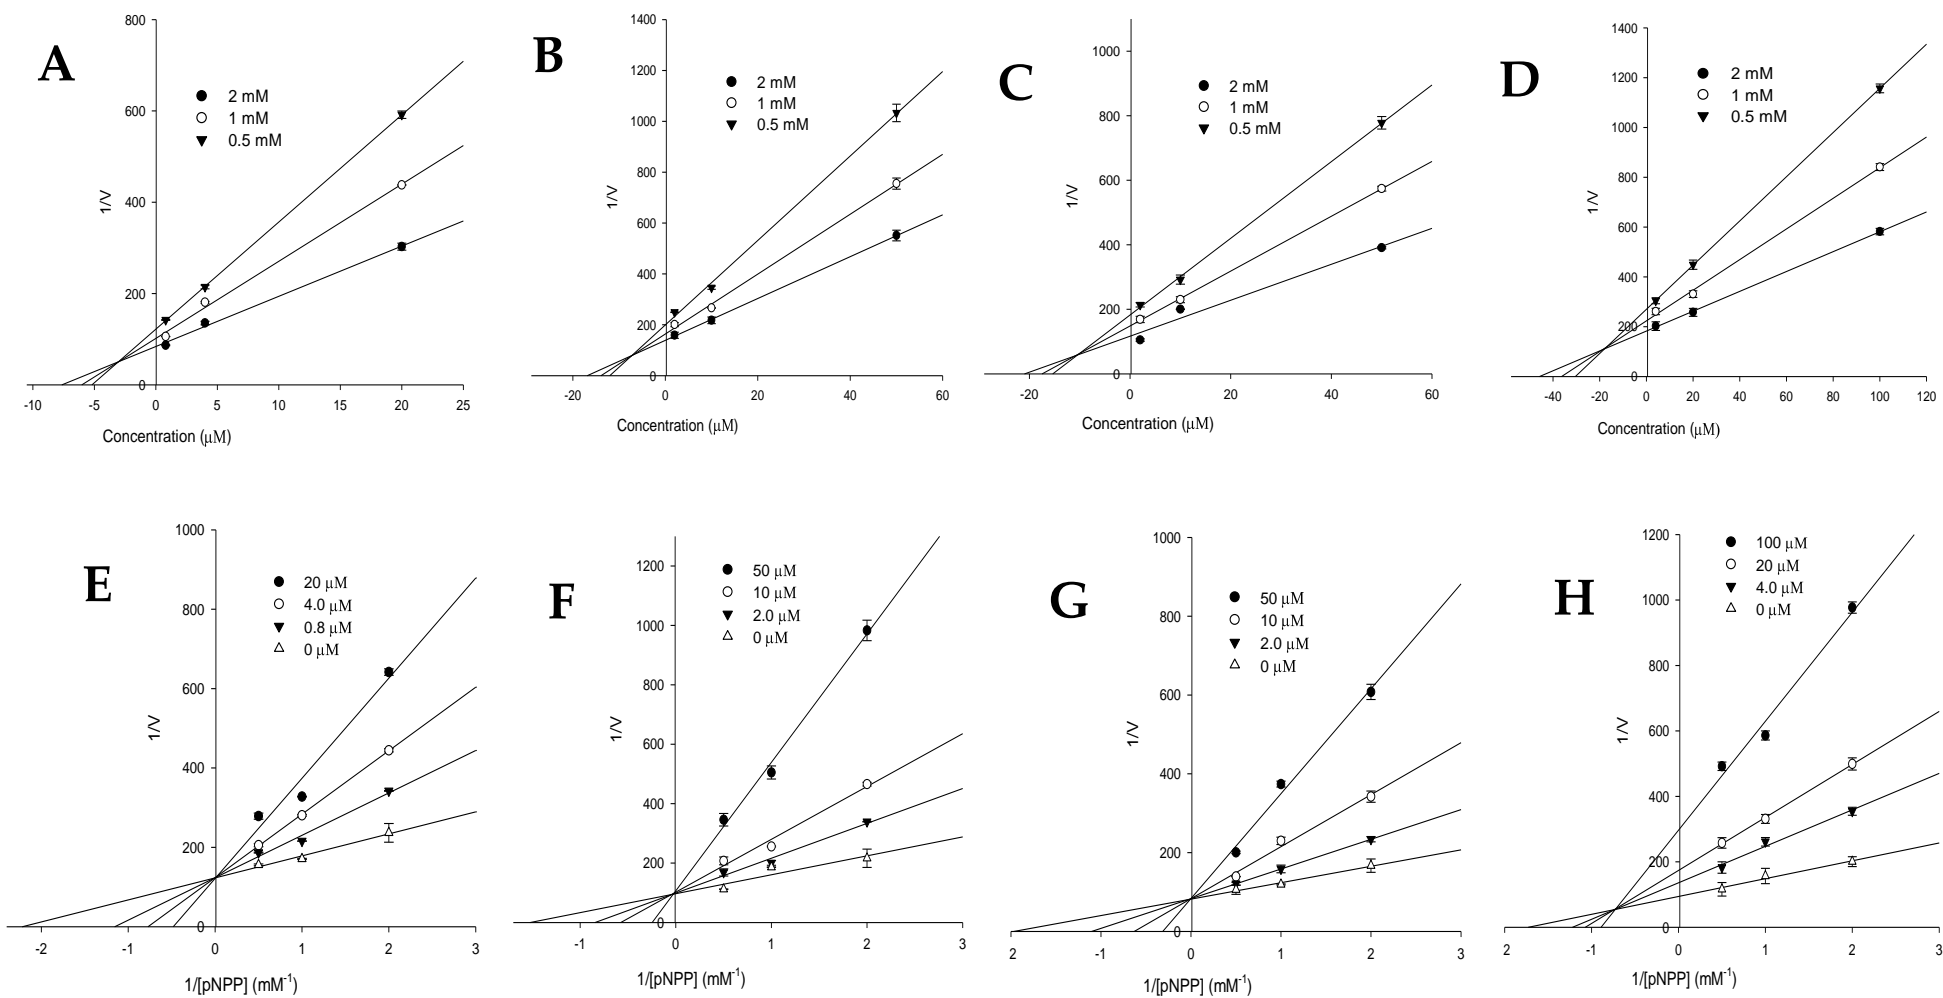

**Figure S1.** Dixon plots for PTP1B inhibition of dihydroxanthyletin-type coumarins. (+)-*trans*-decurssidinol (A), Pd-C-I (B), Pd-C-II (C), Pd-C-III (D), were tested in the presence of different concentration of substrate (pNPP): 2mM (●); 1mM (○) and 0.5 mM (▼). Lineweaver-Burk plot for PTP1B inhibition of coumarins. PTP1B inhibition was analyzed in the presence of different concentration of sample as follows: 0  $\mu$ M ( $\Delta$ ), 0.8  $\mu$ M (▼), 4.0  $\mu$ M (○) and 20  $\mu$ M (●) for (+)-*trans*-decurssidinol (E); 0  $\mu$ M ( $\Delta$ ), 2  $\mu$ M (▼), 10  $\mu$ M (○) and 50  $\mu$ M (●) for Pd-C-I (F); 0  $\mu$ M ( $\Delta$ ), 2  $\mu$ M (▼), 10  $\mu$ M (○) and 50  $\mu$ M (●) for Pd-C-II (G); 0  $\mu$ M ( $\Delta$ ), 4  $\mu$ M (▼), 20  $\mu$ M (○) and 100  $\mu$ M (●) for Pd-C-III (H).

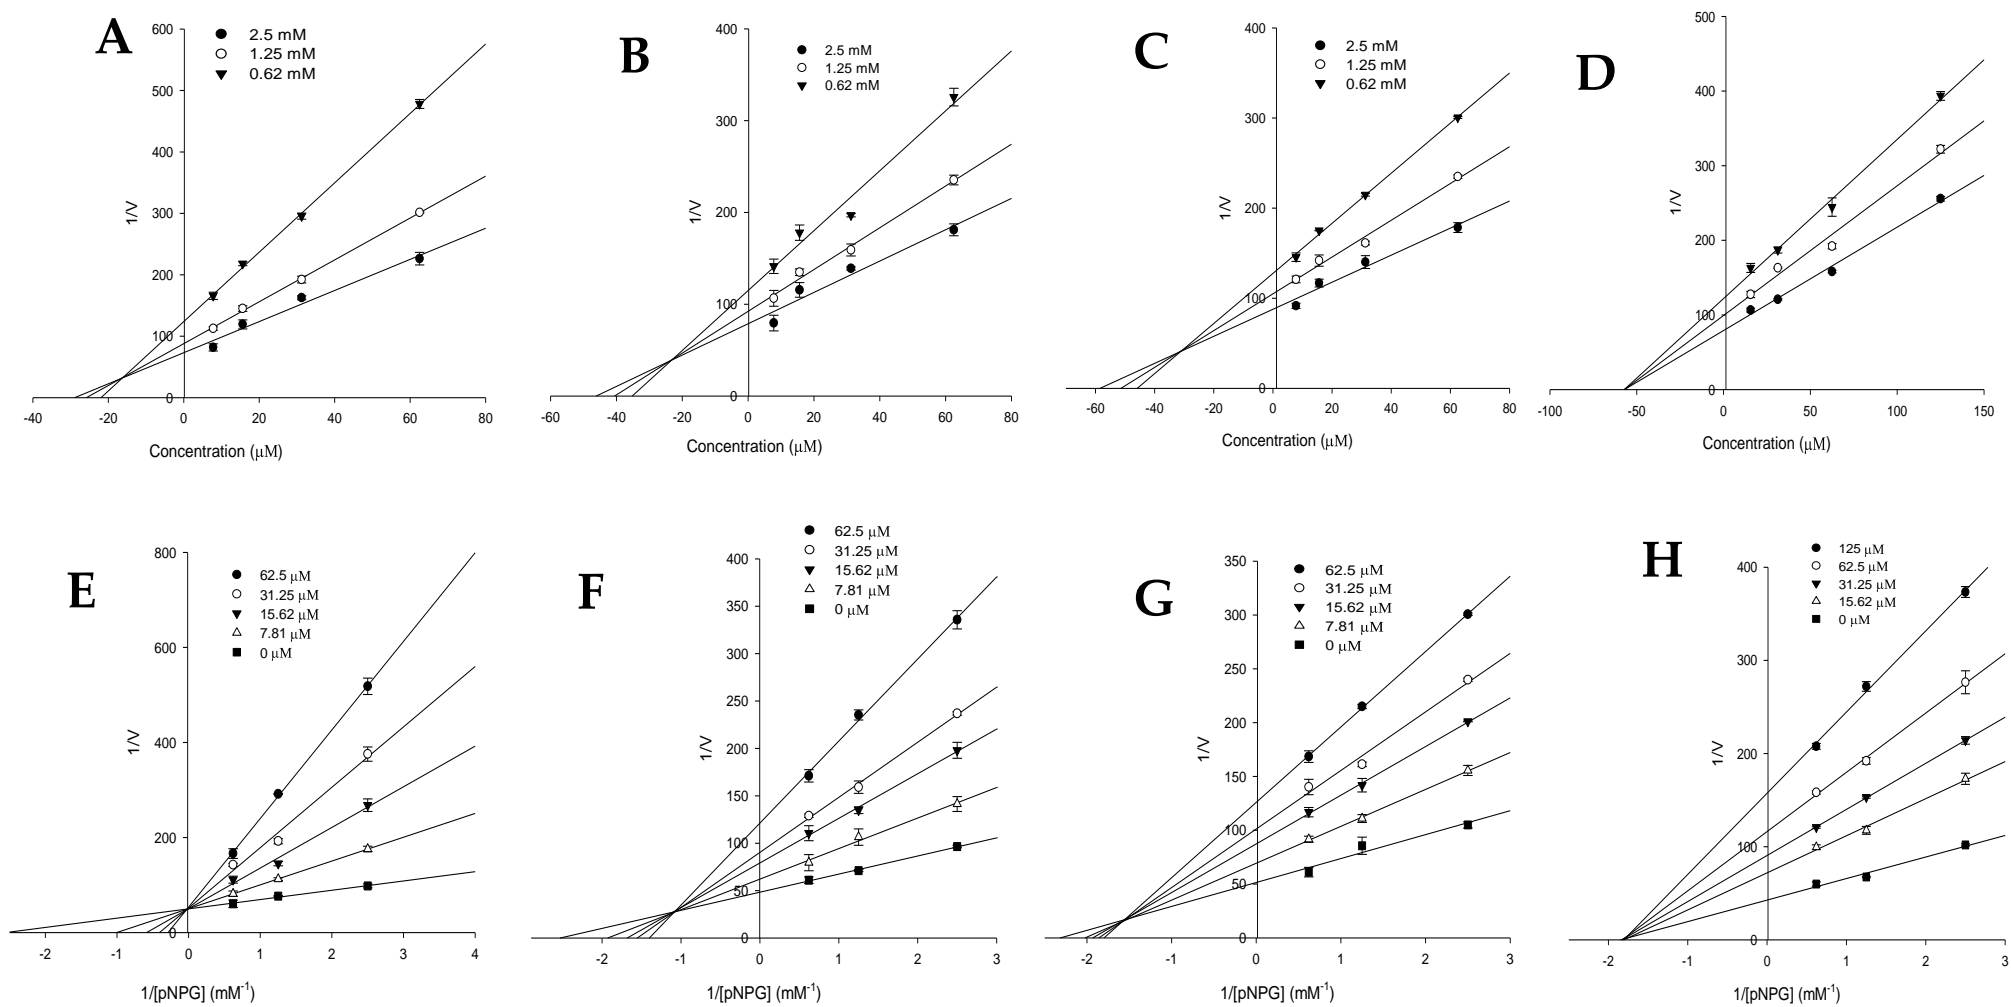

**Figure S2.** Dixon plots for  $\alpha$ -glucosidase inhibition of dihydroxanthyletin-type coumarins. (+)-*trans*-decursidinol (A), Pd-C-I (B), Pd-C-II (C), Pd-C-III (D) were tested in the presence of different concentration of substrate (pNPG): 2.5mM (●); 1.25mM (○) and 0.625 mM (▼). Lineweaver-Burk plot for  $\alpha$ -glucosidase inhibition of coumarins.  $\alpha$ -Glucosidase inhibition was analyzed in the presence of different concentration of sample as follows: 0  $\mu\text{M}$  (■), 7.81  $\mu\text{M}$  (△), 15.62  $\mu\text{M}$  (▼), 31.25  $\mu\text{M}$  (○) and 62.5  $\mu\text{M}$  (●) for (+)-*trans*-decursidinol (E); 0  $\mu\text{M}$  (■), 7.81  $\mu\text{M}$  (△), 15.62  $\mu\text{M}$  (▼), 31.25  $\mu\text{M}$  (○) and 62.5  $\mu\text{M}$  (●) for Pd-C-I (F); 0  $\mu\text{M}$  (■), 7.81  $\mu\text{M}$  (△), 15.62  $\mu\text{M}$  (▼), 31.25  $\mu\text{M}$  (○) and 62.5  $\mu\text{M}$  (●) for Pd-C-II (G); 0  $\mu\text{M}$  (■), 15.62  $\mu\text{M}$  (△), 31.25  $\mu\text{M}$  (▼), 62.5  $\mu\text{M}$  (○) and 125  $\mu\text{M}$  (●) for Pd-C-III (H).

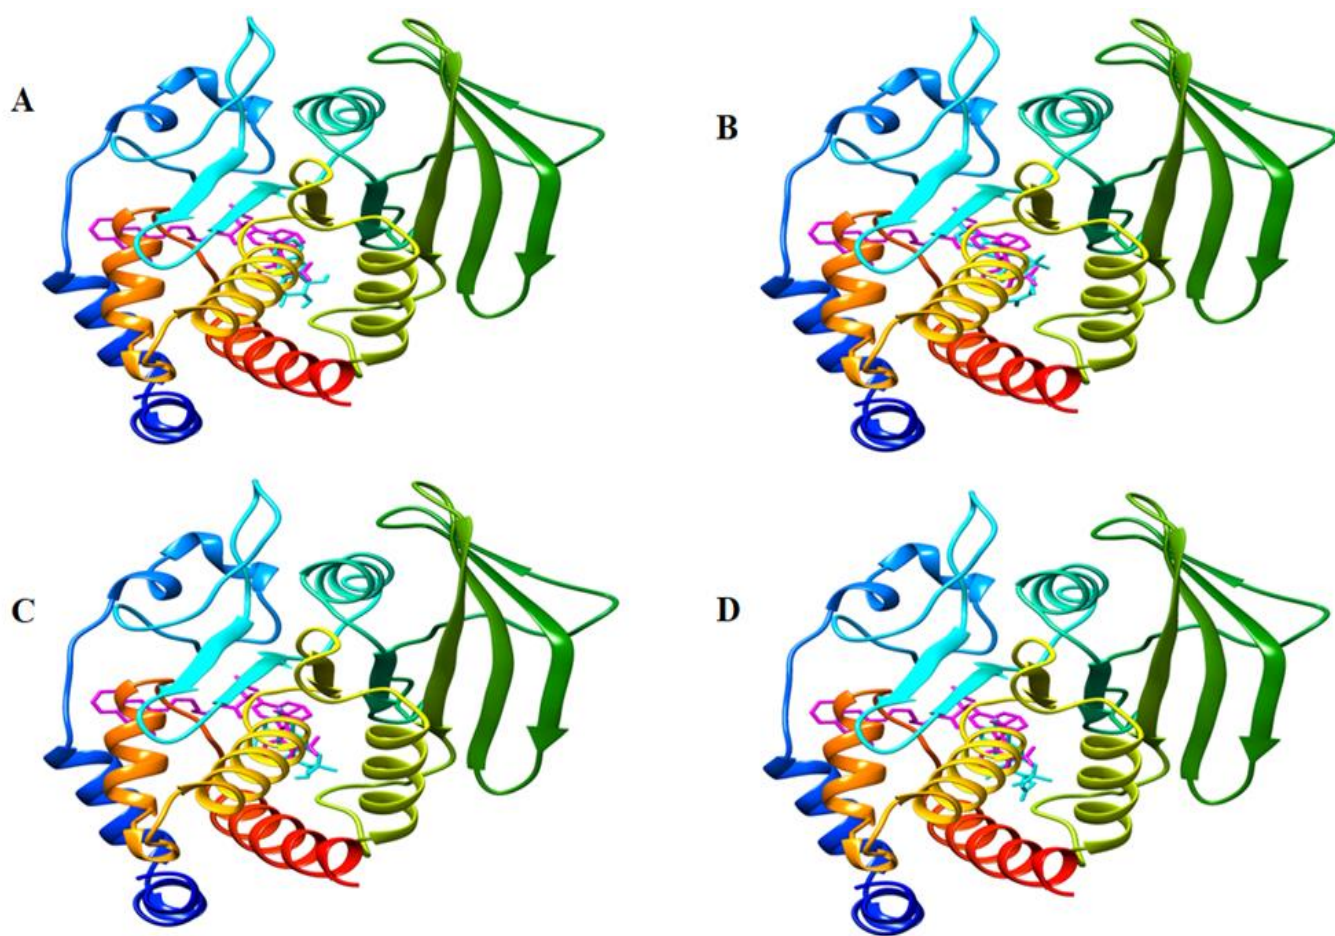

**Figure S3.** Molecular docking models for PTP1B inhibition of (+)-trans-decursidinol (A), Pd-C-I (B), Pd-C-II (C), and Pd-C-III (D). Compound 23 denote (magenta color) and dihydroxanthyletin-type coumarins (light blue color).

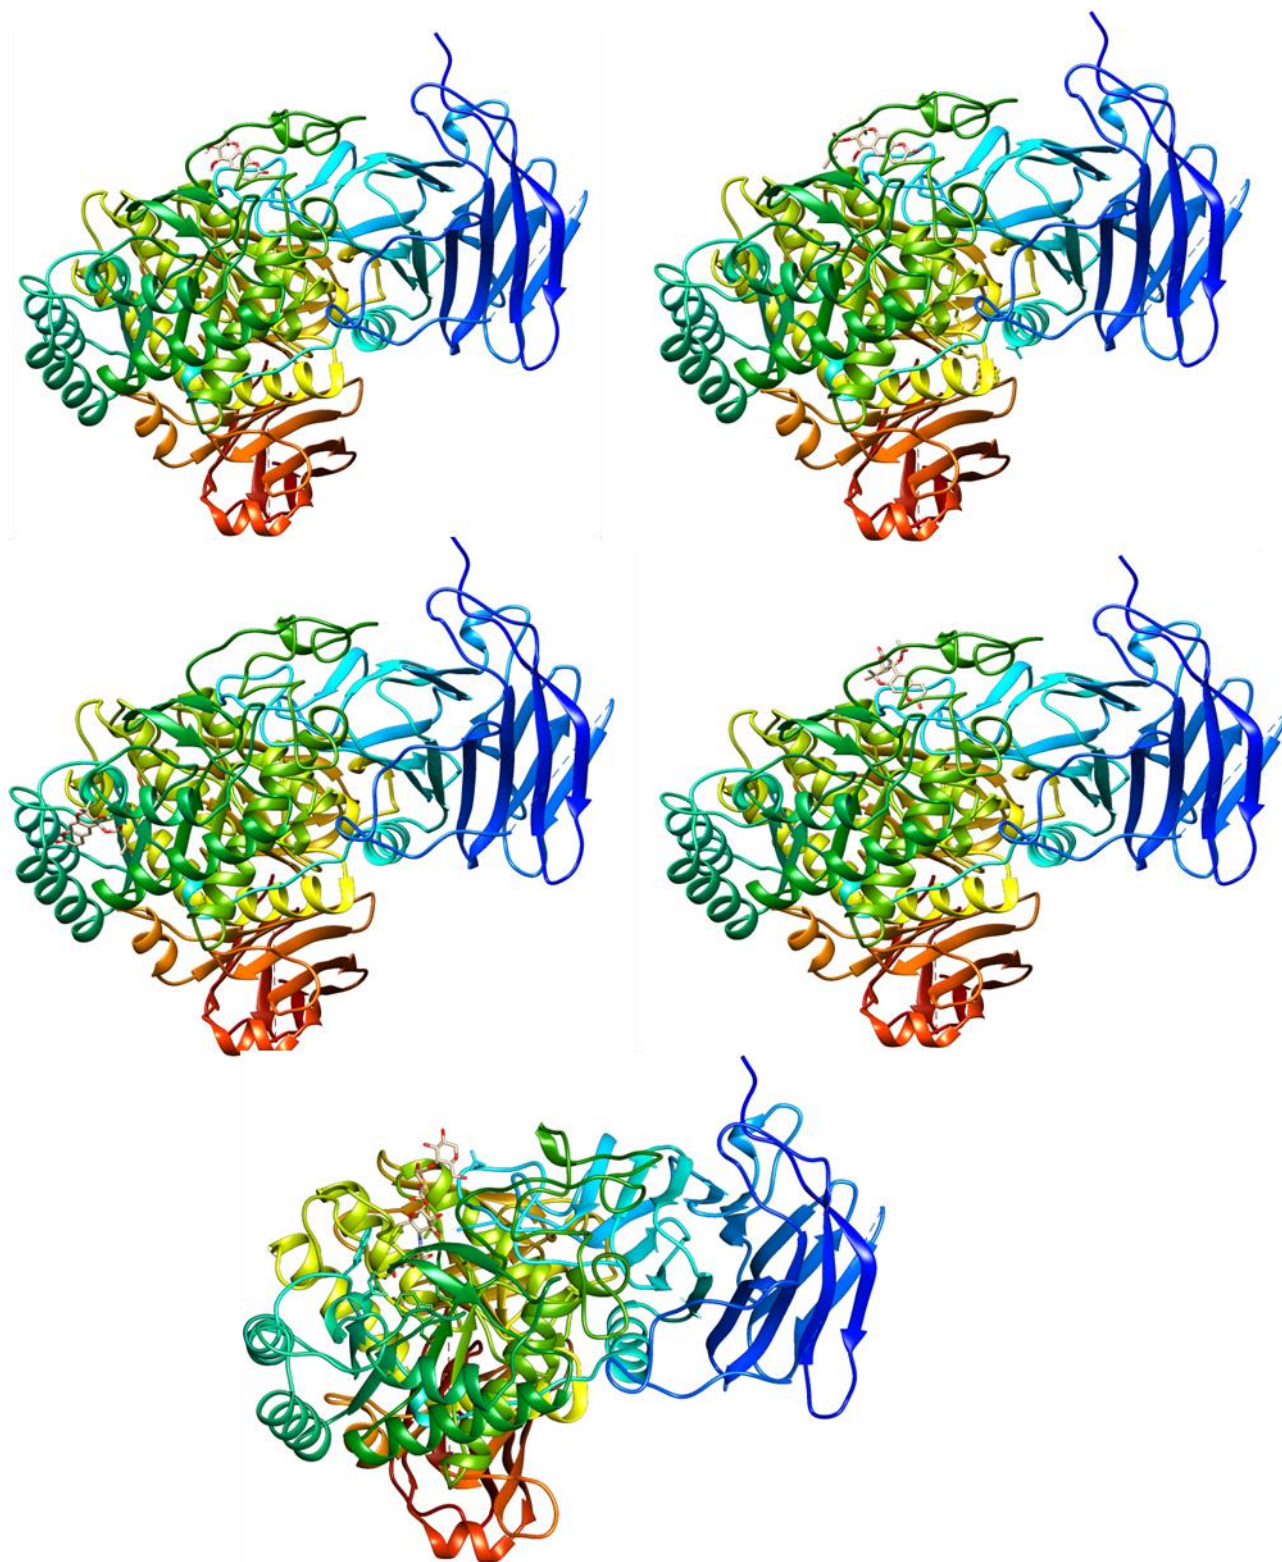

**Figure S4.** Molecular docking models for  $\alpha$ -glucosidase inhibition of (+)-*trans*-decursidinol (A), Pd-C-I (B), Pd-C-II (C), Pd-C-III (D) and acarbose (E).
